# Supplementary material
Source: PubMed Central journal article supplement (PMC7178363)
Supplement: ao9b04086_si_001.pdf [file ao9b04086_si_001.pdf]

## Supporting Information

### **Dual-function antibacterial micelle *via* self-assembling block copolymers with various antibacterial nanoparticles**

Qing Zhong,<sup>1,†</sup> Hui Long,<sup>1</sup> Wei Hu,<sup>1,†</sup> Liu Jun Shi,<sup>1</sup> Fei Zan,<sup>3</sup> Meng Xiao,<sup>1</sup> Shaozao Tan,<sup>1</sup> Yu Ke,<sup>2,\*</sup> Gang Wu<sup>3,\*</sup> and Huifang Chen<sup>4,\*</sup>

<sup>1</sup>Guangdong Engineering & Technology Research Centre of Graphene-Like Materials and Products, College of Chemistry and Materials Science, Jinan University, Guangzhou 510632, China

<sup>2</sup>Department of Biomedical Engineering, Key Laboratory of Biomaterials of Guangdong Higher Education Institutes, College of Life Science and Technology, Jinan University, Guangzhou 510632, China

<sup>3</sup>Department of Biomedical Engineering, South China University of Technology, Guangzhou 510641, China

<sup>4</sup>College of pharmacy, Guangdong Lingnan Institute of Technology, Guangzhou, 510663, China

<sup>†</sup>These authors contribute equally.

\*Corresponding author, E-mail addresses: lisa6863@163.com (Y. Ke), imwugang@scut.edu.cn (G. Wu), chenhf\_1968@163.com (H. Chen).

## Results and discussion

### FTIR spectra

FTIR analysis of ZnO NPs and Ag-ZnO NPs is illustrated in Figure S1. The stretching bands in  $400 \sim 600 \text{ cm}^{-1}$  were the typical absorption peaks of ZnO NPs (Figure S1, I-a), in which the sharp peaks at  $431.1 \text{ cm}^{-1}$  and  $520.5 \text{ cm}^{-1}$  were attributed to the lattice vibration of ZnO. The broad peak at  $3660.2 \text{ cm}^{-1}$  was assigned to the vibration of the hydroxyl on the surface of ZnO NPs. Two distinct peaks at  $1387.6 \text{ cm}^{-1}$  and  $1506.7 \text{ cm}^{-1}$  corresponded to the bending vibration of  $\text{CO}_3^{2-}$ ,<sup>1</sup> perhaps owing to the reaction of sodium hydroxide and air during the synthesis of ZnO NPs.

Figure S1 (I-b) indicates the FTIR spectrum of Ag-ZnO NPs. The bands at  $3430.8 \text{ cm}^{-1}$  and  $1611.9 \text{ cm}^{-1}$  were attributed to the stretching and bending vibration of the hydroxyl groups on Ag-ZnO surface. The absorption bands at  $2924.4 \text{ cm}^{-1}$  and  $1391.1 \text{ cm}^{-1}$  belonged to the stretching vibration of N-O in nitrate. The peaks at  $794.1 \text{ cm}^{-1}$  and  $704.7 \text{ cm}^{-1}$  were assigned to the stretching vibration of Zn-O-H and the bending vibration of Zn-O-Zn, respectively. An additional peak at  $627.0 \text{ cm}^{-1}$  was perhaps due to the formation of Ag-ZnO NPs. Compared with those of ZnO NPs, the characteristic stretching vibration of Zn-O in  $400 \sim 600 \text{ cm}^{-1}$  shifted to lower values because the electron cloud density of Zn-O decreased *via* the inductive effect of Ag. Additionally, the sharp peaks at  $1506.7 \text{ cm}^{-1}$  and  $1387.6 \text{ cm}^{-1}$  in the FTIR spectrum of ZnO NPs disappeared.

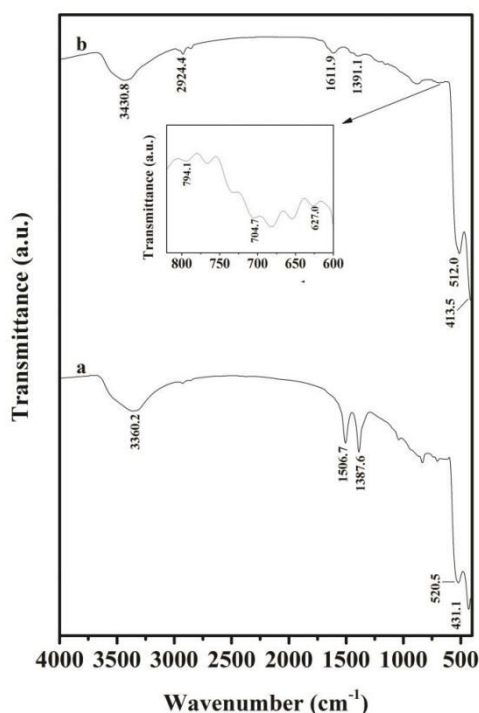

Figure S1. FTIR spectra of the nanocomposites of ZnO NPs (a) and Ag-ZnO NPs (b)

### XRD spectra

XRD patterns of ZnO and Ag-ZnO NPs is shown in Figure S2. Ag-ZnO NPs presented the distinctive diffraction peaks at  $32.1^\circ$ ,  $34.7^\circ$ ,  $36.6^\circ$ ,  $47.9^\circ$ ,  $56.9^\circ$ ,  $63.2^\circ$ ,  $66.6^\circ$ ,  $68.3^\circ$ ,  $69.4^\circ$ ,  $72.8^\circ$  and  $77.3^\circ$ , corresponding to (100), (022), (101), (102), (110), (103), (200), (112), (201), (004) and (202) planes of hexagonal (wurtzite) crystal structure of ZnO NPs, respectively. Another peaks at  $2\theta = 38.4^\circ$ ,  $44.6^\circ$  and  $64.9^\circ$  of Ag-ZnO NPs matched with the (111), (200) and (220) planes of metallic silver. Compared with ZnO, the diffraction position and lattice parameters of Ag-ZnO did not change remarkably, indicating that Ag was not doped into ZnO lattice. This can be attributed to a larger silver ion radius ( $r_{\text{Ag}^+}=126\text{pm}$ ) than the zinc ion radius ( $r_{\text{Zn}^{2+}} = 74\text{pm}$ ), therefore, the silver metalloid phase was formed on the surface of ZnO NPs. The crystallite size and interplanar spacing of nanoparticles were

calculated by Bragg equation ( $2d\sin\theta = n\lambda$ ) and Scherer's formula ( $D=0.9\lambda/\beta \cos \theta$ ). The crystal spacing ( $d$ ) and particle size ( $D$ ) were 2.45 Å and ~45.51 nm for ZnO NPs, and 2.34 Å and ~41.77 nm for Ag metallic NPs, respectively.

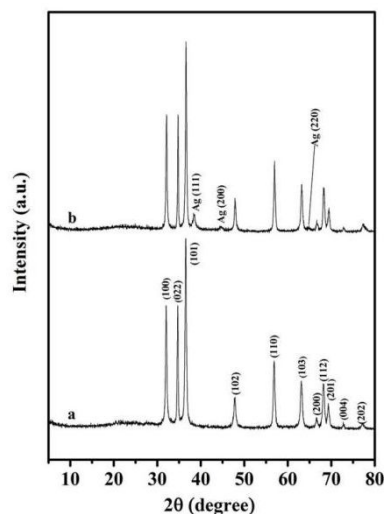

Figure S2. XRD spectra of ZnO (a) and Ag-ZnO (b) NPs

### Thermal decomposition

Figure S3 illustrates TGA and DTG plots of PPP<sub>312</sub>-ZnO and PPP<sub>312</sub>-Ag-ZnO with different contents of the nanoparticles, and the corresponding parameters are summarized in Table S1. Similar to PPP<sub>312</sub>, the nanocomposites presented two major degradation stages caused by the thermal decomposition of PHBV and PEG successively. The initial and final decomposition temperatures and the peak decomposition temperature ( $T_i$ ,  $T_f$  and  $T_p$ ) of the nanocomposites reduced compared with those of PPP<sub>312</sub>, by (13.3~22.4) °C, (9.8~17.5) °C, (10.3~16.7) °C and (7.4~18.3) °C, (2.0~7.7) °C, (11.9~17.4) °C, respectively for the first and second main stages, indicating the influence of the nanoparticles on the thermal degradation of the triblock copolymers.

In the first main stage, the nanocomposites with 10% NPs showed a weigh loss of about 34.8% between 243.5 °C and 278.6 °C, while a weight loss of 41.1~42.5% for the nanocomposites with 5% NPs was observed within 252.2~285.4 °C; As the content of the nanoparticles increased,  $T_{i1}$ ,  $T_{f1}$ ,  $T_{p1}$  and the weight loss ( $W_1$ ) reduced significantly. ZnO and Ag-ZnO NPs would weaken PHBV-PEG interaction and

promote the oxidative decomposition of PPP<sub>312</sub>. The carboxyl groups *via* the thermal degradation of PHBV (PHB) may react with hydroxyl groups of the decomposed PEG segments, instead of the hydroxyl groups on ZnO surface. The later case may form carboxylate-zinc oxide compounds to improve the thermal stability of PHB/ZnO composites<sup>2</sup>. In the second stage, the nanocomposite with 10% NPs decomposed with a weight loss of 24.9~27.4% within 355.5~417.5 °C, and a weight loss of 24.6~25.4% within 353.7~418.4 °C for that of 5% NPs. The effect of nanoparticles on the thermal degradation of PEG fragments was not obvious, and silver had little effect on the thermal properties of the nanocomposites.

While subtracting the residual weight of PPP<sub>312</sub> (~7.49%), the residual contents at 800 °C were 7.98%, 4.40%, 8.01% and 5.88%, respectively for PPP<sub>312</sub>-10% Ag-ZnO, PPP<sub>312</sub>-5% Ag-ZnO, PPP<sub>312</sub>-10% ZnO and PPP<sub>312</sub>-5% ZnO, which would be the weight percentage of ZnO or Ag-ZnO NPs because the nanocomposites did not lose weight remarkably at temperatures above 500 °C. These contents were little smaller than the theoretical ones, perhaps owing to volatilization of water or small molecules that had been physically adsorbed on the nanoparticles surface below 250 °C.

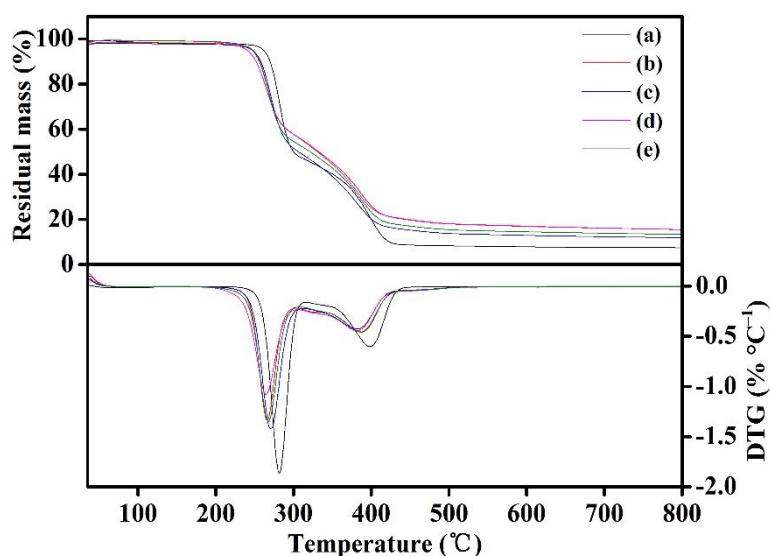

Figure S3. TGA and DTG curves of PPP<sub>312</sub> (a), PPP<sub>312</sub>-10% Ag-ZnO (b), PPP<sub>312</sub>-5%

Ag-ZnO (c), PPP<sub>312</sub>-10% ZnO (d), PPP<sub>312</sub>-5% ZnO (e)

Table S1. Thermal degradation properties of PPP<sub>312</sub>-Ag-ZnO and PPP<sub>312</sub>-ZnO

nanocomposites

| Sample                         | $T_{i1}$ (°C) <sup>a</sup> | $T_{f1}$ (°C) <sup>b</sup> | $T_{p1}$ (°C) <sup>c</sup> | $W_1$ (%) <sup>d</sup> | $T_{i2}$ (°C) <sup>a</sup> | $T_{f2}$ (°C) <sup>b</sup> | $T_{p2}$ (°C) <sup>c</sup> | $W_2$ (%) <sup>d</sup> | CR (%) <sup>e</sup> |
|--------------------------------|----------------------------|----------------------------|----------------------------|------------------------|----------------------------|----------------------------|----------------------------|------------------------|---------------------|
| PPP <sub>312</sub>             | 265.9                      | 295.2                      | 281.4                      | 46.32                  | 372.0                      | 420.4                      | 399.8                      | 26.61                  | 7.49                |
| PPP <sub>312</sub> -10% Ag-ZnO | 249.5                      | 277.7                      | 266.1                      | 34.74                  | 364.6                      | 417.5                      | 387.3                      | 27.35                  | 15.47               |
| PPP <sub>312</sub> -5% Ag-ZnO  | 252.6                      | 285.4                      | 271.1                      | 42.46                  | 353.7                      | 412.7                      | 383.9                      | 24.57                  | 11.89               |
| PPP <sub>312</sub> -10% ZnO    | 243.5                      | 278.6                      | 264.7                      | 34.76                  | 355.5                      | 414.7                      | 382.7                      | 24.87                  | 15.50               |
| PPP <sub>312</sub> -5% ZnO     | 252.2                      | 283.8                      | 267.5                      | 41.07                  | 357.7                      | 418.4                      | 387.9                      | 25.40                  | 13.37               |

<sup>a</sup>:  $T_{i1}$  and  $T_{i2}$  representing the initial thermal degradation temperatures of the first and second main degradation process, respectively.

<sup>b</sup>:  $T_{f1}$  and  $T_{f2}$  representing the final thermal degradation temperatures of the first and second main degradation process, respectively.

<sup>c</sup>:  $T_{p1}$  and  $T_{p2}$  representing the peak temperatures that correspond to the maximum degradation rate in the first and second main degradation process, respectively.

<sup>d</sup>:  $W_1$  and  $W_2$  representing the mass loss percentages of the first and second main degradation process, respectively.

<sup>e</sup>: CR representing char residue at 800 °C.

## Reference:

1. Shah, J.; Kotnala, R. K., Rapid green synthesis of ZnO nanoparticles using a hydroelectric cell without an electrolyte. *Journal of Physics and Chemistry of Solids* **2017**, *108*, 15-20.
2. Rodríguez-Tobías, H.; Morales, G.; Ledezma, A.; Romero, J.; Saldívar, R.; Langlois, V.; Renard, E.; Grande, D., Electrospinning and electrospraying techniques for designing novel antibacterial poly (3-hydroxybutyrate)/zinc oxide nanofibrous composites. *Journal of Materials Science* **2016**, *51* (18), 8593-8609.
